# Supplementary material for: MoS2-Carbon Nanodots as a New Electrochemiluminescence Platform for Breast Cancer Biomarker Detection
Source: MDPI journal article supplement (doi:10.3390/bios13030348), 2023-03-05
Supplement: s1 [file s1]

Supplementary Material

# MoS<sub>2</sub>-Carbon Nanodots as New Electrochemiluminescence Platform for Breast Cancer Biomarker Detection

Laura Gutiérrez-Gálvez <sup>1</sup>, Manuel Vázquez Sulleiro <sup>2</sup>, Cristina Gutiérrez-Sánchez <sup>1</sup>, Daniel García-Nieto <sup>3</sup>, Mónica Luna <sup>3</sup>, Emilio M. Pérez <sup>2</sup>, Tania García-Mendiola <sup>1,4,\*</sup> and Encarnación Lorenzo <sup>1,2,4</sup>

<sup>1</sup> Departamento de Química Analítica y Análisis Instrumental. Universidad Autónoma de Madrid. 28049, Madrid, Spain

<sup>2</sup> IMDEA-Nanociencia, Ciudad Universitaria de Cantoblanco. 28049, Madrid, Spain

<sup>3</sup> Instituto de Micro y Nanotecnología IMN-CNM, CSIC (CEI UAM+CSIC), Isaac Newton 8. Tres Cantos. 28760, Madrid, Spain

<sup>4</sup> Institute for Advanced Research in Chemical Sciences (IAdChem). Universidad Autónoma de Madrid. 28049, Madrid, Spain

\* Correspondence: tania.garcia@uam.es

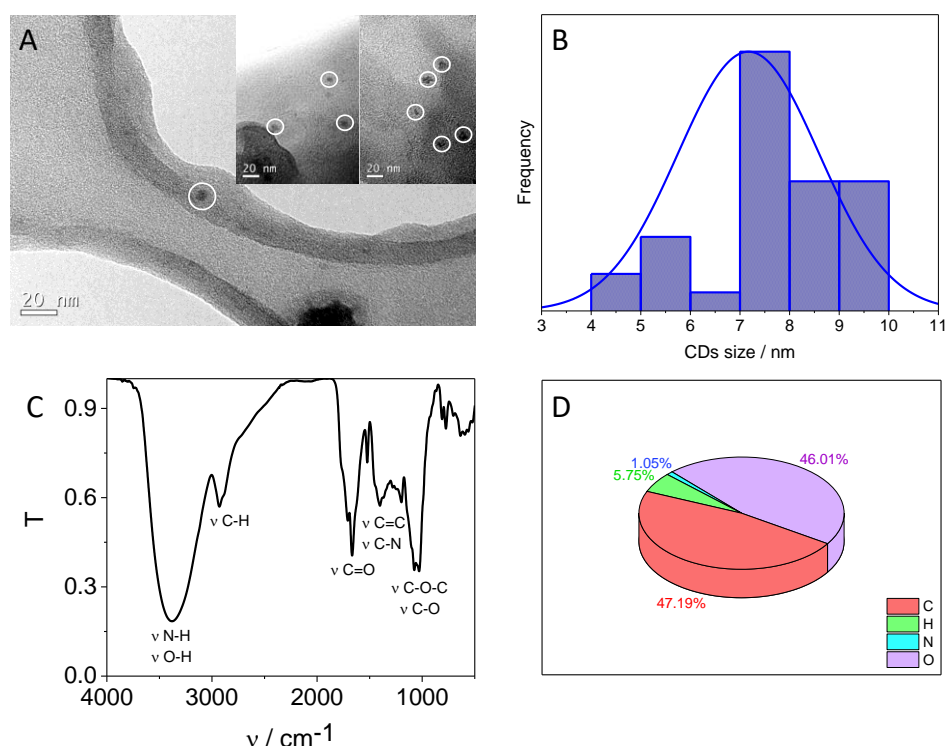

**Citation:** Gutiérrez-Gálvez, L.; Sulleiro, M.V.; Gutiérrez-Sánchez, C.; García-Nieto, D.; Luna, M.; Pérez, E.M.; García-Mendiola, T.; Lorenzo, E. MoS<sub>2</sub>-Carbon Nanodots as New Electrochemiluminescence Platform for Breast Cancer Biomarker Detection. *Biosensors* **2023**, *13*, 348.

<https://doi.org/10.3390/bios13030348>

Received: 1 February 2023

Revised: 23 February 2023

Accepted: 2 March 2023

Published: 5 March 2023

**Figure S1.** (A) Transmission Electron Microscopy (TEM) images, (B) size histogram, (C) infrared absorption spectrum and (D) elemental analysis of the obtained carbon nanodots (CDs).

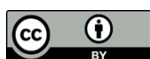

**Copyright:** © 2023 by the authors.

Licensee MDPI, Basel, Switzerland.

This article is an open access article distributed under the terms and conditions of the Creative Commons Attribution (CC BY) license (<https://creativecommons.org/licenses/by/4.0/>).

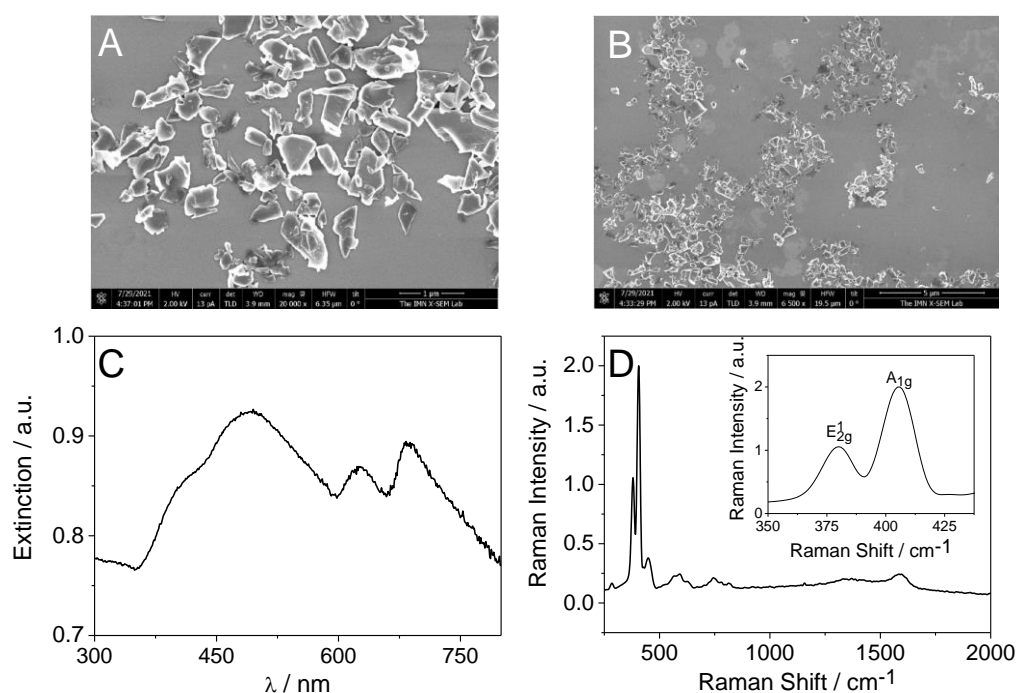

**Figure S2.** (A and B) Scanning Electron Microscopy (SEM) images of MoS<sub>2</sub>-NS taken with a model VERIOS 460 from FEI. (C) Extinction and (D) Raman spectra (laser excitation 532 nm) of MoS<sub>2</sub>-NS (the insert corresponds to a broadening of the spectra in the region of 350 to 438 cm<sup>-1</sup>).

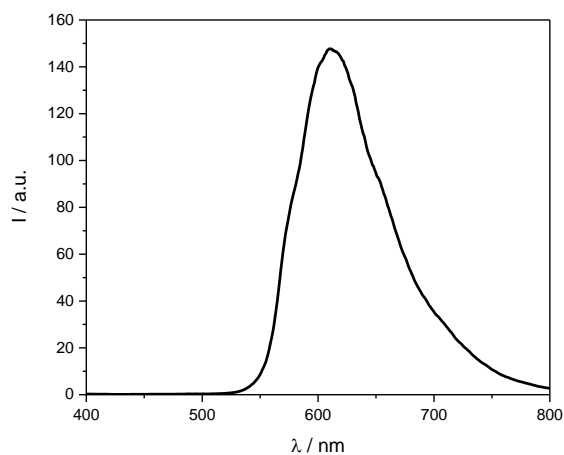

**Figure S3.** Fluorescence spectrum of 20  $\mu$ M [Ru(bpy)<sub>3</sub>]<sup>2+</sup> in 0.2M PB pH 8 obtained exciting at the maximum absorption wavelength of [Ru(bpy)<sub>3</sub>]<sup>2+</sup> specie ( $\lambda_{\text{exc}} = 286$  nm).

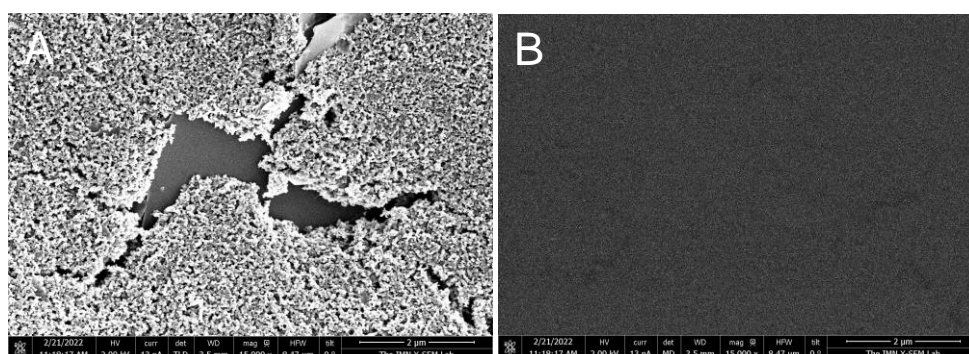

**Figure S4.** (A) Secondary and (B) backscattered electrons SEM images of bare Carbon Screen Printed Electrode (CSPE).

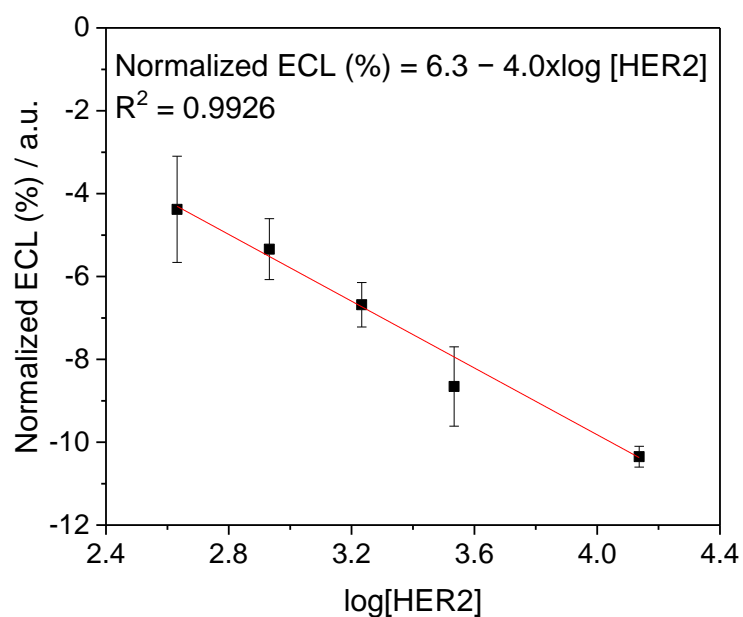

**Figure S5.** Calibration curve (n=3) of the normalized ECL response of the aptasensor vs log HER2 concentration (from 428 fg/mL to 13.7 pg/mL). Same experimental conditions than Figure 6.

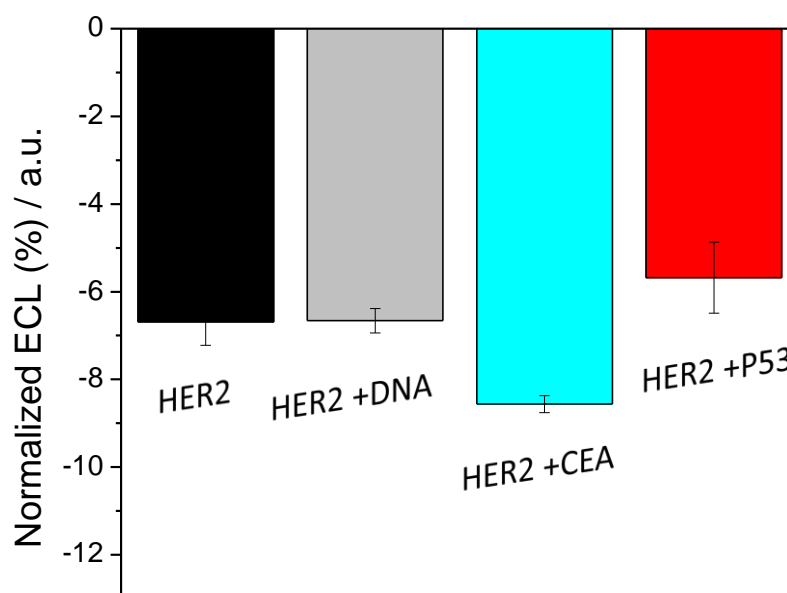

**Figure S6.** Interference study (n=3, three different platforms): ECL aptasensor response in presence of a solution of 1.71 pg/mL HER2 (black bar), 1.71 pg/mL HER2 and 1  $\mu$ M non-complementary DNA sequence (grey bar), 1.71 pg/mL HER2 and 100 ng/mL CEA (blue bar) and 1.71 pg/mL HER2 and 1.0 ng/mL p53 (red bar).
